# Supplementary material for: Optical Remote Sensing Ship Classification and Recognition based on Improved YOLOv5
Source: Preprints.org preprint supplement (doi:10.20944/preprints202307.0150.v1), 2023-07-04
Supplement: Supplementary file 1 [file a-Plot Data.xlsx]

## Sheet: Sheet1
a-Plot data
Data-1（Figure 12. Comparison of experimental results before and after algorithm improvement）												Data-2（Figure 15. Comparison of the experimental results of the Improved-YOLOv5 with various algorithms）
（a）AP by ship type			（b）Overall loss of model			（c）mAP_0.5			（d）mAP_0.5:0.95				（a）Faster R-CNN		（b）SSD		（c）YOLOv3		（d）YOLOv4		（f）YOLOv7		（e）Improved-YOLOv5
x	y		x	y		x	y		x	y		x	y		y		y		y		y		y
Vessel Type	AP(%)		Epoch	Loss		Epoch	mAP_0.5		Epoch	mAP_0.5:0.95		Epoch	Loss	mAP	Loss	mAP	Loss	mAP	Loss	mAP	Loss	mAP	Loss	mAP
	YOLOv5	Improved-YOLOv5		YOLOv5	Improved-YOLOv5		YOLOv5	Improved-YOLOv5		YOLOv5	Improved-YOLOv5	0	1.61027	0	13.1151	0	1.11074	0	3.25058	0	0.121	0	0.0698615	0
Container Ship（CS）	88.4	89.9	1	0.0842825	0.0698615	1	0.053007	3.3945e-05	1	0.013118	7.8039e-06	10	1.30845	0.128315	6.94442	0.205267	0.284779	0.03194	0.641388	0.000503842	0.096515	0.0411782	0.0514581	0.149606
Dry Cargo Ship（DCS）	93.4	93.9	2	0.0722125	0.0659248	2	0.16267	0.0016747	2	0.052139	0.00036546	20	1.11618	0.235717	5.09519	0.30053	0.135052	0.134734	0.21258	0.0259412	0.082578	0.118045	0.0323015	0.459528
Liquid Cargo Ship（LCS）	88.7	87.9	3	0.0632868	0.0634746	3	0.26344	0.042265	3	0.084037	0.0096275	30	1.04076	0.307506	4.78667	0.317623	0.121116	0.218971	0.18971	0.0660195	0.079492	0.17889	0.0274687	0.571866
Passenger Ship（PS）	73	82.9	4	0.0584612	0.0540991	4	0.22196	0.10109	4	0.062247	0.024765	40	0.999165	0.347117	4.56827	0.327139	0.11227	0.26685	0.177577	0.101336	0.07496	0.22002	0.0252625	0.610509
Warship（WS）	97.6	96	5	0.055182	0.0505382	5	0.40212	0.11141	5	0.13705	0.030615	50	0.979841	0.360759	4.42664	0.342716	0.106479	0.300881	0.167505	0.16208	0.071262	0.2619	0.0237733	0.651513
Engineering Ship（ES）	47.4	59.3	6	0.0515286	0.0474138	6	0.51812	0.20168	6	0.23188	0.065296	60	1.12038	0.352654	4.2461	0.420874	0.106479	0.351905	0.138882	0.191027	0.068549	0.3146	0.0228327	0.683401
Sand Carrier（SC）	56.5	61.3	7	0.0486634	0.042912	7	0.5652	0.21715	7	0.24652	0.074868	70	1.04121	0.387583	3.58389	0.435486	0.0900718	0.409108	0.129831	0.214671	0.066462	0.35144	0.0218337	0.708972
Fishing Boat（FB）	76.7	82.7	8	0.0465609	0.0415809	8	0.58172	0.25058	8	0.26457	0.083809	80	0.990914	0.424709	3.33957	0.452981	0.0846384	0.422427	0.123783	0.2313	0.064258	0.38341	0.0209662	0.724244
Tugboat（TB）	59	58.8	9	0.0454919	0.0401718	9	0.60362	0.27542	9	0.26969	0.084462	90	0.954376	0.453309	3.18249	0.464884	0.0798814	0.484798	0.120258	0.251603	0.063144	0.40477	0.0202179	0.727555
Motorboat（MB）	68	68.6	10	0.0435916	0.0386046	10	0.64822	0.29476	10	0.29405	0.10396	100	0.91409	0.467674	2.98825	0.475023	0.0760048	0.488748	0.115511	0.275578	0.063188	0.40102	0.0196505	0.73751
			11	0.0435631	0.0369071	11	0.63258	0.38449	11	0.29384	0.14415	110	0.892391	0.475398	2.88636	0.484509	0.0730588	0.50039	0.112814	0.295192	0.061042	0.44581	0.0193186	0.742217
			12	0.0427432	0.0348893	12	0.67882	0.37296	12	0.3045	0.12833	120	0.870586	0.49556	2.79234	0.48196	0.0707544	0.518352	0.109059	0.325617	0.059403	0.46572	0.0188609	0.753504
			13	0.0420187	0.0340424	13	0.658	0.41793	13	0.31379	0.16019	130	0.844022	0.479602	2.7023	0.499947	0.0677986	0.527272	0.106916	0.334381	0.05799	0.48283	0.0183972	0.751998
			14	0.0414957	0.0330596	14	0.68782	0.42759	14	0.32329	0.16117	140	0.815904	0.499906	2.63461	0.503137	0.0659271	0.539485	0.104125	0.343898	0.056669	0.51047	0.0180217	0.761431
			15	0.0397885	0.0325007	15	0.68828	0.47826	15	0.31536	0.19325	150	0.798227	0.506561	2.58138	0.51788	0.0635253	0.546403	0.102685	0.355008	0.058026	0.49804	0.0177165	0.758792
			16	0.0396189	0.0316374	16	0.69127	0.47854	16	0.34291	0.19887	160	0.783736	0.510993	2.50848	0.509702	0.0621569	0.561973	0.101213	0.368752	0.056147	0.5165	0.017353	0.765312
			17	0.0409733	0.0313532	17	0.70405	0.5003	17	0.34536	0.20412	170	0.771401	0.506429	2.43763	0.515459	0.0610389	0.55932	0.0994796	0.381843	0.05434	0.54298	0.0171156	0.767739
			18	0.0391646	0.02997	18	0.71441	0.51417	18	0.35321	0.21374	180	0.751293	0.521489	2.39415	0.517678	0.0590421	0.556903	0.0983128	0.386789	0.053424	0.56006	0.0168956	0.766627
			19	0.0392718	0.0296882	19	0.71712	0.4962	19	0.3489	0.20899	190	0.729881	0.519195	2.35104	0.510191	0.0583157	0.564506	0.0970117	0.383777	0.052136	0.5704	0.0166075	0.775841
			20	0.0387969	0.0289671	20	0.69575	0.52484	20	0.35033	0.23058	200	0.712932	0.507471	2.328	0.510737	0.0571503	0.565597	0.0967848	0.399403	0.051294	0.58546	0.016274	0.77633
			21	0.0382341	0.0294271	21	0.73249	0.56483	21	0.34998	0.24567	210	0.7008	0.517353	2.29662	0.525795	0.0558765	0.577432	0.0958983	0.416872	0.050939	0.5917	0.016039	0.774137
			22	0.0374261	0.0288636	22	0.70389	0.55121	22	0.33724	0.23809	220	0.692973	0.516565	2.26034	0.512607	0.0549843	0.57276	0.0653528	0.408147	0.050318	0.60003	0.0158151	0.774505
			23	0.0379095	0.0285456	23	0.71382	0.57769	23	0.35442	0.24326	230	0.678716	0.520309	2.26273	0.529327	0.0540609	0.580381	0.0646999	0.410682	0.04938	0.6133	0.015595	0.772693
			24	0.0374166	0.0274424	24	0.70139	0.53806	24	0.3406	0.23682	240	0.676669	0.510456	2.21435	0.527911	0.0542726	0.562808	0.0639614	0.401609	0.048898	0.62014	0.0153338	0.767615
			25	0.0374538	0.0275824	25	0.73342	0.56698	25	0.3661	0.26322	250	0.661768	0.512469	2.19678	0.526949	0.0531238	0.589507	0.0636256	0.395362	0.048434	0.62186	0.0151035	0.775145
			26	0.0364171	0.0270736	26	0.73066	0.55401	26	0.37148	0.25231	260	0.657246	0.523068	2.19892	0.527995	0.0523954	0.588286	0.0630074	0.408386	0.047738	0.62684	0.0148579	0.774804
			27	0.0362672	0.0274815	27	0.74846	0.59342	27	0.38125	0.26159	270	0.646769	0.518518	2.17366	0.528468	0.0525716	0.590486	0.0626506	0.410526	0.047525	0.63463	0.0147196	0.772683
			28	0.0363832	0.026317	28	0.73542	0.60913	28	0.37662	0.2801	280	0.646765	0.505832	2.18651	0.524048	0.052563	0.577196	0.06288	0.412609	0.047278	0.63165	0.0145442	0.770667
			29	0.0366337	0.0259549	29	0.75021	0.57012	29	0.3803	0.25045	290	0.643533	0.50321	2.18083	0.521306	0.0520866	0.581752	0.0630591	0.420098	0.046603	0.63748	0.0143424	0.771727
			30	0.0367917	0.0259992	30	0.76104	0.59321	30	0.37853	0.26814	300	0.648081	0.507725	2.16834	0.529505	0.0526078	0.580107	0.0630718	0.405176	0.046433	0.64013	0.0134888	0.77696
			31	0.0362677	0.0266232	31	0.76273	0.59878	31	0.38163	0.2737
			32	0.0353146	0.0261971	32	0.76053	0.58927	32	0.39069	0.27247
			33	0.0360023	0.0252985	33	0.75188	0.6075	33	0.386	0.27486
			34	0.0362753	0.025731	34	0.73844	0.60091	34	0.38109	0.27398
			35	0.0359828	0.0250034	35	0.7258	0.6166	35	0.36281	0.28191
			36	0.0349184	0.0251364	36	0.73684	0.61129	36	0.37947	0.27841
			37	0.0353298	0.0248522	37	0.73847	0.62038	37	0.3763	0.29897
			38	0.0348041	0.0246876	38	0.75394	0.62679	38	0.38268	0.28992
			39	0.0354061	0.0247684	39	0.7553	0.60602	39	0.38405	0.29028
			40	0.0343495	0.0243275	40	0.74106	0.62755	40	0.38843	0.30757
			41	0.0345278	0.0241681	41	0.74764	0.63142	41	0.38197	0.30376
			42	0.0351137	0.0245834	42	0.73584	0.63592	42	0.37152	0.29379
			43	0.0350911	0.0238341	43	0.7502	0.64197	43	0.39415	0.29726
			44	0.0340455	0.0239852	44	0.73727	0.63053	44	0.37944	0.28963
			45	0.0342766	0.0239117	45	0.75431	0.66167	45	0.39327	0.31953
			46	0.0341476	0.0239243	46	0.74741	0.64377	46	0.37196	0.30727
			47	0.0331557	0.0232997	47	0.73547	0.67101	47	0.37028	0.31396
			48	0.0334315	0.0234764	48	0.7489	0.64638	48	0.38465	0.31024
			49	0.0343383	0.0231566	49	0.74418	0.66876	49	0.39179	0.31577
			50	0.0339113	0.0233936	50	0.73214	0.6837	50	0.38588	0.31653
			51	0.0328348	0.0229646	51	0.73528	0.68165	51	0.38433	0.32632
			52	0.0336389	0.0232432	52	0.75705	0.66893	52	0.39274	0.32476
			53	0.0338532	0.0236032	53	0.74421	0.68445	53	0.37542	0.31291
			54	0.033035	0.0231902	54	0.73888	0.6826	54	0.39014	0.33193
			55	0.0330274	0.0231325	55	0.73828	0.65274	55	0.38383	0.31194
			56	0.0333637	0.0229494	56	0.75296	0.6935	56	0.39013	0.33718
			57	0.0336776	0.0227607	57	0.75165	0.68597	57	0.39049	0.32851
			58	0.0330647	0.0220188	58	0.7533	0.69092	58	0.3962	0.33638
			59	0.033163	0.0224073	59	0.73776	0.70045	59	0.38607	0.3416
			60	0.0325537	0.0220569	60	0.74768	0.6928	60	0.38084	0.33951
			61	0.0335593	0.022359	61	0.75118	0.69613	61	0.39227	0.3379
			62	0.0330506	0.0225442	62	0.74288	0.70348	62	0.38564	0.35548
			63	0.0334599	0.022166	63	0.74217	0.69625	63	0.39128	0.34273
			64	0.0334856	0.0217202	64	0.74647	0.70931	64	0.39115	0.3445
			65	0.0324369	0.0216682	65	0.73537	0.70999	65	0.38582	0.35561
			66	0.0323129	0.0222137	66	0.72459	0.70898	66	0.38447	0.34839
			67	0.0320736	0.0214201	67	0.74733	0.71292	67	0.39881	0.33615
			68	0.0324668	0.0218075	68	0.75419	0.71706	68	0.39061	0.35201
			69	0.0321898	0.0216552	69	0.74536	0.71773	69	0.38092	0.35608
			70	0.0319359	0.0207834	70	0.75093	0.71787	70	0.39985	0.34684
			71	0.0326459	0.0207967	71	0.74476	0.70897	71	0.38292	0.34804
			72	0.0324161	0.0209909	72	0.74237	0.71286	72	0.38736	0.35745
			73	0.0309751	0.0211787	73	0.74842	0.73652	73	0.39263	0.36007
			74	0.0312376	0.0216487	74	0.74924	0.71953	74	0.39598	0.35272
			75	0.033181	0.02082	75	0.75164	0.71676	75	0.39103	0.36341
			76	0.032399	0.0210427	76	0.75289	0.71992	76	0.39751	0.36189
			77	0.0321157	0.0212618	77	0.74576	0.72114	77	0.39252	0.36461
			78	0.0304704	0.0209116	78	0.74051	0.74056	78	0.38706	0.36554
			79	0.0325097	0.0206932	79	0.75238	0.71635	79	0.38998	0.34661
			80	0.0315747	0.0203177	80	0.75389	0.74983	80	0.39741	0.37737
			81	0.0312454	0.020569	81	0.75517	0.71925	81	0.40399	0.37139
			82	0.031498	0.0201265	82	0.75789	0.72062	82	0.39475	0.36609
			83	0.0314641	0.0202398	83	0.7444	0.7233	83	0.38888	0.36914
			84	0.0306215	0.0205586	84	0.75877	0.72981	84	0.39187	0.37383
			85	0.0314115	0.0200061	85	0.76077	0.72207	85	0.39667	0.36764
			86	0.0307596	0.0198411	86	0.74299	0.73221	86	0.38726	0.37108
			87	0.0308308	0.0202743	87	0.74257	0.74479	87	0.39046	0.3794
			88	0.0314616	0.0204133	88	0.74909	0.73872	88	0.39387	0.38053
			89	0.0302785	0.0203552	89	0.76123	0.72286	89	0.40577	0.37287
			90	0.0307494	0.0197955	90	0.74326	0.72192	90	0.39145	0.37553
			91	0.0308573	0.0195376	91	0.74303	0.73425	91	0.3905	0.37672
			92	0.0301343	0.0203961	92	0.74221	0.72997	92	0.39635	0.37613
			93	0.0317526	0.019901	93	0.73544	0.73938	93	0.38932	0.37801
			94	0.0304369	0.0196598	94	0.74447	0.74358	94	0.39317	0.38236
			95	0.031236	0.0195318	95	0.73966	0.74273	95	0.39531	0.38526
			96	0.0317067	0.0195149	96	0.74353	0.74532	96	0.39639	0.37011
			97	0.0307667	0.019506	97	0.74313	0.73868	97	0.3971	0.38237
			98	0.0311854	0.0192837	98	0.74645	0.73247	98	0.39511	0.37583
			99	0.0298997	0.0196115	99	0.74882	0.73326	99	0.39919	0.38366
			100	0.0318268	0.0195628	100	0.74908	0.73546	100	0.40573	0.38516
			101	0.0294276	0.0193141	101	0.73175	0.74025	101	0.38693	0.38841
			102	0.0305164	0.0196298	102	0.72987	0.73266	102	0.39101	0.37125
			103	0.0297607	0.0194722	103	0.73785	0.74013	103	0.39284	0.38337
			104	0.0311893	0.0191441	104	0.73542	0.74112	104	0.39415	0.39613
			105	0.0294991	0.0197404	105	0.74429	0.74815	105	0.3905	0.40137
			106	0.0306466	0.0190159	106	0.74557	0.75444	106	0.39548	0.38741
			107	0.0304394	0.0189367	107	0.73637	0.75026	107	0.38906	0.39412
			108	0.0299293	0.019155	108	0.74588	0.74379	108	0.39914	0.38005
			109	0.0297376	0.0194393	109	0.74184	0.74333	109	0.39956	0.39224
			110	0.030349	0.019338	110	0.72767	0.72804	110	0.40027	0.38081
			111	0.0303086	0.0188273	111	0.73898	0.74245	111	0.39682	0.39252
			112	0.0302768	0.0187235	112	0.73513	0.75498	112	0.38756	0.39505
			113	0.0305572	0.018698	113	0.74005	0.75994	113	0.39808	0.3971
			114	0.0311448	0.0190025	114	0.74553	0.75242	114	0.40179	0.39761
			115	0.030791	0.0187987	115	0.74535	0.74694	115	0.3976	0.38727
			116	0.0308267	0.0189319	116	0.74117	0.74529	116	0.40142	0.38603
			117	0.0307076	0.0194075	117	0.73664	0.75372	117	0.39348	0.3931
			118	0.029579	0.0184654	118	0.73444	0.76766	118	0.39285	0.39961
			119	0.0294275	0.0189079	119	0.71929	0.75281	119	0.39082	0.3952
			120	0.0294211	0.0188465	120	0.73268	0.75883	120	0.3846	0.39839
			121	0.0307499	0.0186803	121	0.73483	0.74784	121	0.4034	0.40218
			122	0.0306777	0.0184521	122	0.73354	0.76539	122	0.40265	0.39555
			123	0.0300244	0.0188532	123	0.72948	0.75248	123	0.38534	0.39561
			124	0.0295854	0.0183441	124	0.73006	0.75459	124	0.38926	0.39545
			125	0.0300925	0.0186521	125	0.7348	0.75446	125	0.39376	0.40106
			126	0.0293761	0.0182154	126	0.73894	0.74624	126	0.3913	0.39257
			127	0.0303334	0.0180094	127	0.72902	0.75189	127	0.3907	0.39575
			128	0.0301824	0.0184127	128	0.73362	0.75188	128	0.39821	0.39781
			129	0.0285644	0.0186818	129	0.73124	0.73664	129	0.39188	0.39369
			130	0.0295322	0.0176706	130	0.72423	0.75857	130	0.39143	0.39558
			131	0.0295898	0.018439	131	0.73274	0.75653	131	0.3953	0.3991
			132	0.0301522	0.0180692	132	0.73663	0.76167	132	0.39429	0.40412
			133	0.0296991	0.0183378	133	0.7359	0.76339	133	0.39618	0.40691
			134	0.0294431	0.0180999	134	0.73645	0.75483	134	0.3935	0.40588
			135	0.0297738	0.0176303	135	0.7432	0.76449	135	0.39382	0.40802
			136	0.0285017	0.0175645	136	0.73096	0.77053	136	0.38954	0.41277
			137	0.0291665	0.0179429	137	0.73824	0.76593	137	0.39557	0.4022
			138	0.0301069	0.0183132	138	0.74018	0.76504	138	0.39518	0.4135
			139	0.0293809	0.0179885	139	0.74486	0.75831	139	0.39938	0.40273
			140	0.0294212	0.0178318	140	0.73958	0.75359	140	0.40096	0.40248
			141	0.0289905	0.0178247	141	0.73903	0.77013	141	0.39374	0.40884
			142	0.0287933	0.0181461	142	0.74027	0.75389	142	0.39688	0.40797
			143	0.0284461	0.0173403	143	0.73844	0.76411	143	0.39668	0.41044
			144	0.0290695	0.0177356	144	0.7432	0.74616	144	0.40158	0.40166
			145	0.0293942	0.0176774	145	0.74405	0.75495	145	0.39923	0.3992
			146	0.027639	0.017674	146	0.74815	0.76226	146	0.40243	0.40612
			147	0.0273653	0.0178112	147	0.74802	0.76192	147	0.40388	0.40791
			148	0.029125	0.0174883	148	0.74861	0.75458	148	0.39935	0.4042
			149	0.0287142	0.0175777	149	0.74623	0.75766	149	0.40562	0.40373
			150	0.028525	0.0178895	150	0.74038	0.76226	150	0.39409	0.40483
			151	0.0289666	0.0174095	151	0.73803	0.76572	151	0.3981	0.408
			152	0.028393	0.0172705	152	0.73819	0.76238	152	0.39652	0.40649
			153	0.0286607	0.017571	153	0.74416	0.76911	153	0.40031	0.41042
			154	0.027615	0.0171823	154	0.73738	0.76004	154	0.3962	0.40579
			155	0.0288039	0.0169301	155	0.74449	0.76754	155	0.40139	0.40366
			156	0.0296521	0.0176553	156	0.74129	0.75452	156	0.39967	0.40045
			157	0.0295221	0.0168247	157	0.73505	0.76505	157	0.39899	0.40271
			158	0.0280994	0.0178887	158	0.72104	0.76641	158	0.38943	0.41236
			159	0.029029	0.0171999	159	0.73794	0.77197	159	0.39817	0.41432
			160	0.0281841	0.0175975	160	0.75038	0.77038	160	0.40093	0.41379
			161	0.0277481	0.0169022	161	0.74765	0.77334	161	0.40085	0.4187
			162	0.0276409	0.0174374	162	0.74502	0.75993	162	0.40087	0.41013
			163	0.0277589	0.0173199	163	0.74777	0.76487	163	0.40517	0.41298
			164	0.0284099	0.0173545	164	0.74221	0.77479	164	0.40113	0.42154
			165	0.0282055	0.0169367	165	0.74344	0.76962	165	0.40313	0.40839
			166	0.028124	0.0175007	166	0.74416	0.77081	166	0.40065	0.41655
			167	0.0286014	0.0167711	167	0.74242	0.76624	167	0.39952	0.41224
			168	0.0284387	0.0171709	168	0.74904	0.76303	168	0.39912	0.40585
			169	0.0278538	0.016778	169	0.75175	0.76692	169	0.40429	0.40863
			170	0.0280863	0.0169844	170	0.74281	0.76784	170	0.39969	0.40892
			171	0.0290753	0.0169693	171	0.7486	0.76675	171	0.40512	0.41146
			172	0.0282241	0.0168813	172	0.74705	0.76715	172	0.40861	0.4066
			173	0.0286485	0.0172965	173	0.75306	0.76616	173	0.40566	0.40769
			174	0.0274416	0.0168959	174	0.74601	0.76571	174	0.40763	0.41821
			175	0.0287335	0.0169305	175	0.75378	0.76495	175	0.40699	0.41138
			176	0.0286364	0.01676	176	0.74685	0.76428	176	0.40553	0.4132
			177	0.0270453	0.0165781	177	0.75275	0.76909	177	0.40547	0.41143
			178	0.0272109	0.0169789	178	0.74699	0.76917	178	0.40821	0.41651
			179	0.0285392	0.0169315	179	0.73981	0.771	179	0.39627	0.41419
			180	0.0289213	0.0167337	180	0.74196	0.76201	180	0.39619	0.40914
			181	0.0283316	0.0168235	181	0.73928	0.77691	181	0.39687	0.41485
			182	0.027694	0.0165851	182	0.73758	0.77569	182	0.398	0.4158
			183	0.0280195	0.0165332	183	0.74103	0.77234	183	0.39985	0.41618
			184	0.0269569	0.0164169	184	0.73714	0.77696	184	0.39686	0.41753
			185	0.0283151	0.0162783	185	0.74017	0.76806	185	0.39949	0.41698
			186	0.0283428	0.01648	186	0.73369	0.76992	186	0.39972	0.42001
			187	0.0274478	0.0168416	187	0.74222	0.77878	187	0.39998	0.41878
			188	0.0280656	0.0162995	188	0.74471	0.78007	188	0.40012	0.41982
			189	0.0275083	0.016841	189	0.74373	0.78121	189	0.39513	0.42345
			190	0.0279474	0.0169754	190	0.7375	0.77847	190	0.39446	0.42314
			191	0.0274666	0.0166725	191	0.73481	0.77647	191	0.39716	0.4141
			192	0.0275907	0.0161663	192	0.7387	0.76662	192	0.39963	0.41128
			193	0.0276773	0.0159554	193	0.73779	0.77971	193	0.39414	0.41301
			194	0.0280799	0.0159775	194	0.74633	0.77382	194	0.40147	0.4082
			195	0.0263723	0.0164496	195	0.74334	0.78218	195	0.40141	0.41439
			196	0.0274742	0.0165437	196	0.73328	0.77276	196	0.39888	0.41021
			197	0.0272652	0.0166765	197	0.74142	0.77774	197	0.39941	0.41565
			198	0.0273993	0.0162276	198	0.7436	0.7786	198	0.40264	0.41888
			199	0.0266603	0.0157966	199	0.74041	0.77273	199	0.40309	0.4144
			200	0.0277089	0.0166454	200	0.74643	0.78267	200	0.40278	0.41685
			201	0.0273104	0.0159161	201	0.73903	0.78094	201	0.4007	0.41768
			202	0.0280214	0.0164666	202	0.74853	0.77819	202	0.4003	0.41282
			203	0.0275539	0.0161539	203	0.7548	0.77281	203	0.40493	0.41346
			204	0.0271598	0.0158363	204	0.74996	0.77001	204	0.40249	0.41102
			205	0.0274759	0.0157415	205	0.75019	0.76774	205	0.4042	0.41239
			206	0.0270533	0.0158745	206	0.75098	0.77746	206	0.40429	0.41581
			207	0.027913	0.0166535	207	0.74936	0.77315	207	0.4027	0.41224
			208	0.0275178	0.0154714	208	0.74218	0.77221	208	0.40131	0.41439
			209	0.027946	0.0159952	209	0.74335	0.77424	209	0.40015	0.41543
			210	0.0272893	0.0162813	210	0.74784	0.77462	210	0.39436	0.41546
			211	0.0266617	0.0163285	211	0.75071	0.77384	211	0.39927	0.4175
			212	0.0263932	0.0153026	212	0.73936	0.77731	212	0.39787	0.42033
			213	0.0268439	0.0158932	213	0.74794	0.7792	213	0.4033	0.41958
			214	0.0269402	0.0155454	214	0.74385	0.77078	214	0.40284	0.41929
			215	0.0259066	0.016267	215	0.74731	0.77031	215	0.40385	0.42298
			216	0.0274644	0.0162282	216	0.74832	0.78146	216	0.40159	0.42075
			217	0.0273897	0.0159389	217	0.73577	0.77619	217	0.40054	0.41928
			218	0.026472	0.0158408	218	0.73365	0.7684	218	0.39839	0.41856
			219	0.0274133	0.0153637	219	0.73086	0.77481	219	0.39535	0.41557
			220	0.0257912	0.0154433	220	0.73144	0.77275	220	0.3956	0.41653
			221	0.0274045	0.0157053	221	0.73938	0.77453	221	0.39551	0.41644
			222	0.027149	0.0156311	222	0.73668	0.77351	222	0.397	0.41962
			223	0.0274849	0.0157811	223	0.73584	0.77401	223	0.39544	0.41632
			224	0.0263054	0.0153296	224	0.73644	0.77396	224	0.39477	0.41539
			225	0.0264665	0.0159469	225	0.7425	0.77136	225	0.3964	0.41654
			226	0.0266597	0.015445	226	0.73951	0.77157	226	0.39921	0.42161
			227	0.0270269	0.0158864	227	0.74176	0.77298	227	0.40068	0.41735
			228	0.0269647	0.0155964	228	0.74003	0.77239	228	0.40111	0.41662
			229	0.0261232	0.0154466	229	0.74017	0.77152	229	0.40146	0.41997
			230	0.0263671	0.0151816	230	0.74365	0.7711	230	0.40502	0.41252
			231	0.0272364	0.0156583	231	0.74339	0.76616	231	0.40363	0.41369
			232	0.0271771	0.0152523	232	0.74028	0.76486	232	0.40708	0.4141
			233	0.0268438	0.0152288	233	0.74843	0.7689	233	0.40804	0.41202
			234	0.0267058	0.0154288	234	0.74695	0.76987	234	0.40431	0.41748
			235	0.0255634	0.0152888	235	0.74572	0.76662	235	0.40525	0.41595
			236	0.0259975	0.0152913	236	0.7427	0.76865	236	0.40201	0.41837
			237	0.0252581	0.0151056	237	0.7357	0.76624	237	0.40224	0.41581
			238	0.0260588	0.015483	238	0.73926	0.77031	238	0.40154	0.41639
			239	0.0266341	0.0151446	239	0.73374	0.76788	239	0.40352	0.41512
			240	0.0262881	0.0154561	240	0.73544	0.76666	240	0.40435	0.41381
			241	0.0268577	0.0154564	241	0.73636	0.77681	241	0.40352	0.41743
			242	0.026783	0.0149328	242	0.73689	0.77555	242	0.40026	0.41868
			243	0.0258644	0.0155037	243	0.73467	0.77276	243	0.39846	0.41815
			244	0.0263628	0.0148365	244	0.73658	0.77313	244	0.39845	0.41839
			245	0.0260165	0.0147752	245	0.73817	0.77708	245	0.4008	0.42232
			246	0.0263813	0.0152085	246	0.73631	0.77918	246	0.39899	0.42002
			247	0.025764	0.0146707	247	0.73837	0.77521	247	0.39991	0.41775
			248	0.0253637	0.0153428	248	0.73871	0.77308	248	0.39871	0.41715
			249	0.0252483	0.0151521	249	0.73511	0.77427	249	0.39859	0.41935
			250	0.0254187	0.0151568	250	0.73765	0.77438	250	0.3976	0.41556
			251	0.0258731	0.0148328	251	0.73944	0.77477	251	0.39815	0.41892
			252	0.0262507	0.0148434	252	0.74055	0.77365	252	0.40196	0.41818
			253	0.02584	0.0148557	253	0.74162	0.77462	253	0.40101	0.41982
			254	0.0265303	0.0151652	254	0.7442	0.77515	254	0.40224	0.41757
			255	0.0256023	0.0146962	255	0.7449	0.77496	255	0.4032	0.41983
			256	0.0261278	0.0149942	256	0.7482	0.77651	256	0.4043	0.41963
			257	0.0262456	0.0148396	257	0.74615	0.77703	257	0.40587	0.41651
			258	0.0253008	0.014764	258	0.74737	0.77468	258	0.40542	0.41684
			259	0.026132	0.0149855	259	0.74704	0.77194	259	0.40261	0.41801
			260	0.0257933	0.0146024	260	0.74396	0.77473	260	0.4053	0.42033
			261	0.0253487	0.0149986	261	0.74747	0.77296	261	0.40587	0.41726
			262	0.0248994	0.0148806	262	0.7429	0.77263	262	0.40272	0.41724
			263	0.0264232	0.0150083	263	0.74661	0.77306	263	0.40464	0.41675
			264	0.0266789	0.0149449	264	0.74882	0.77404	264	0.40613	0.41663
			265	0.0261588	0.0148607	265	0.74325	0.77402	265	0.40586	0.4167
			266	0.0262997	0.0143965	266	0.74297	0.77461	266	0.40694	0.41714
			267	0.0259075	0.0148184	267	0.74752	0.7742	267	0.40819	0.41713
			268	0.0259717	0.014664	268	0.74362	0.77031	268	0.40586	0.41801
			269	0.0267565	0.0141864	269	0.7448	0.77008	269	0.40595	0.4176
			270	0.0257455	0.0144374	270	0.74313	0.77092	270	0.40696	0.41801
			271	0.0260161	0.0149733	271	0.74207	0.771	271	0.40763	0.41886
			272	0.0256962	0.0141274	272	0.74565	0.77188	272	0.40612	0.41786
